# Supplementary material for: Synthesis of Fe2(MoO4)3/MoO3 heterostructured microrods and photocatalytic performances
Source: Royal Society of Chemistry journal article supplement (doi:10.1039/c5nj03227j), 2016-01-01
Supplement: c5nj03227j1.pdf [file c5nj03227j1.pdf]

## Supporting Information

### Synthesis of $\text{Fe}_2(\text{MoO}_4)_3/\text{MoO}_3$ heterostructured microrods and photocatalytic performances

Di Li,\* Juanqin Xue, Jing Ma and Jieli Tang

School of Metallurgical Engineering, Xi'an University of Architecture and  
Technology, Xi'an, 710055, China

### Photocatalytic oxidative degradation

The photocatalytic activities of the  $\text{MoO}_3$  nanorods and  $\text{Fe}_2(\text{MoO}_4)_3/\text{MoO}_3$  heterostructured microrods were evaluated by the MB decomposition under ultraviolet irradiation. Ultraviolet light was obtained by a 15 W Hg lamp ( $\lambda = 254 \text{ nm}$ , Cnlight, Feshan) and the average light intensity was  $600 \mu\text{W cm}^{-2}$ . The radiant flux was measured with a power meter (Beijing Normal University, Beijing). The photocatalytic degradation of MB in the aqueous solutions was studied by using  $\text{MoO}_3$  nanorods and  $\text{Fe}_2(\text{MoO}_4)_3/\text{MoO}_3$  heterostructured microrods as the photocatalyst under room temperature and normal atmosphere pressure.  $\text{MoO}_3$  nanorods or  $\text{Fe}_2(\text{MoO}_4)_3/\text{MoO}_3$  heterostructured microrods (50 mg) and 100 mL MB ( $2 \times 10^{-5} \text{ M}$ ) aqueous solution were added into the reactor, and then stirred with a magnetic stirrer prior to irradiation with Hg lamp at room temperature. Prior to irradiation, the solution was put in the dark for 30 min to ensure equilibrium of the working solution. After the reaction, the sample solution was put in centrifuge to remove  $\text{MoO}_3$  nanorods and  $\text{Fe}_2(\text{MoO}_4)_3/\text{MoO}_3$  heterostructured microrods from solution. The solution obtained this way was extracted into a quartz cell. The absorbance of the solution was measured with quartz cells every 5 min.

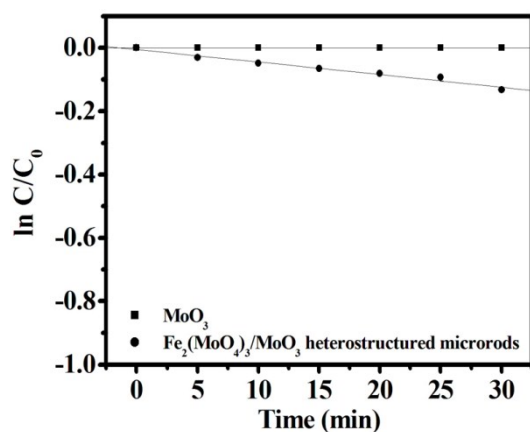

**Fig. 1** First-order plots for the photocatalytic degradation of MB using  $\text{MoO}_3$  nanorods and  $\text{Fe}_2(\text{MoO}_4)_3/\text{MoO}_3$  heterostructured microrods.

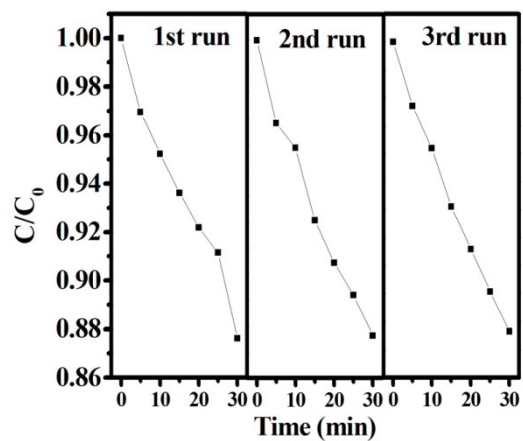

**Fig. 2** Cycling runs in the photocatalytic degradation of MB in the presence of  $\text{Fe}_2(\text{MoO}_4)_3/\text{MoO}_3$  heterostructured microrods under ultraviolet light irradiation;  $\text{Fe}_2(\text{MoO}_4)_3/\text{MoO}_3$  heterostructured microrods loading,  $0.5 \text{ g L}^{-1}$ ; initial concentration of MB,  $2 \times 10^{-5} \text{ M}$ .
